# Supplementary material for: Effectiveness of Platelet-Rich Plasma Therapy in Androgenic Alopecia—A Meta-Analysis
Source: MDPI journal article supplement (doi:10.3390/jpm12030342), 2022-02-24
Supplement: s1 [file s1]

## Supplementary materials

**Table S1.** Inclusion and exclusion criteria for the clinical trials included in the meta-analysis.

| Study                      | Inclusion criteria                                                                                                                                                                                                                                                                 | Exclusion criteria                                                                                                                                                                                                                                                                                                                                                                                                                                                            |
|----------------------------|------------------------------------------------------------------------------------------------------------------------------------------------------------------------------------------------------------------------------------------------------------------------------------|-------------------------------------------------------------------------------------------------------------------------------------------------------------------------------------------------------------------------------------------------------------------------------------------------------------------------------------------------------------------------------------------------------------------------------------------------------------------------------|
| Alves & Grimalt 2016       | Men aged 18-65 with AGA with Hamilton-Norwood patterns II-V<br>Women aged 18-65 with AGA with Ludwig stage I-III                                                                                                                                                                   | Use of any topical (minoxidil, etc.) or oral (finasteride, etc.) medication for hair growth during last 12 months<br>Bleeding disorders, platelet dysfunction syndrome <150,000 platelets/ $\mu$ L<br>Anticoagulant therapy/NSAIDs during previous 2 weeks<br>Smokers >20 cigarettes/day<br>Pregnancy, lactation<br>Chronic active scalp conditions other than AGA<br>History of hair transplant                                                                              |
| Bayat <i>et al.</i> 2019   | Men with AGA with Norwood-Hamilton grade III-V                                                                                                                                                                                                                                     | topical/systemic medication for AGA<br>retinoids or corticosteroids during last 6 months<br>thyroid or collagen vascular diseases<br>chemotherapy<br>other types of alopecia<br>smoking, alcohol intake, malnutrition                                                                                                                                                                                                                                                         |
| Bruce <i>et al.</i> 2019   | Females aged 18 or older with AGA with Ludwig stages I-II                                                                                                                                                                                                                          | Use of any topical (minoxidil, corticosteroids, retinoids etc) or oral (antiandrogens, etc) medication for hair grow during last 3 months<br>Bone marrow aplasia<br>Platelet disorders, antiaggregating, and anticoagulant therapy<br>Sepsis, cancer, immunosuppression<br>Uncompensated diabetes mellitus or propensity for keloid formation<br>Pregnancy                                                                                                                    |
| Butt <i>et al.</i> 2018    | Males aged $\geq 15$ years with AGA type III-VI (Hamilton-Norwood scale) and in females type I-III (Ludwig scale)<br>Patients having increased hair loss during the last 12 months                                                                                                 | Patients with pregnancy, chronic disease like diabetes, any malignancy, thinning of scalp hair globally or in occipital areas<br>Inflammation or any type of infection on scalp<br>Anticoagulant medication during last 5 years                                                                                                                                                                                                                                               |
| Butt <i>et al.</i> 2019    | Male / female patients with androgenetic alopecia aged 15 or older with active hair loss within last 12 months<br>Hamilton score III-VI in male patients<br>Ludwig score I-III in female patients                                                                                  | Patients with inflammation, infection, malignancy, allergic or autoimmune diseases, pregnancy,<br>Current anticoagulant therapy<br>Chemotherapy during last 5 years                                                                                                                                                                                                                                                                                                           |
| Gentile <i>et al.</i> 2015 | Men aged 19-63 with AGA stage Iia-IV (Norwood-Hamilton classification)                                                                                                                                                                                                             | Topical/systemic medication for AGA during the previous 12 months<br>Platelets disorders, thrombocytopenia, antiaggregating therapy<br>Bone marrow aplasia, immunosuppression<br>Uncompensated diabetes, sepsis, or cancer<br>Propensity for keloids                                                                                                                                                                                                                          |
| Hausauer & Jones 2018      | Men / women aged 18-60 with AGA stages Norwood-Hamilton II-V / Ludwig I2-III<br>Subjects whose hair had been clinically stable on FDA-approved AGA therapies (topical minoxidil and/or oral finasteride for 12 months) were allowed to participate without changing their regimens | Non-AGA hair loss, active skin diseases / infections<br>Cuts or abrasions on the scalp<br>History of surgical hair restoration<br>Current or recent malignancy, excluding non-scalp non-melanoma or melanoma skin cancers<br>Current or recent chemotherapy or radiation<br>History of thyroid dysfunction, autoimmune disorders, or blood-borne infections (i.e. HIV, hepatitis B or C)<br>Tendency to develop keloids<br>Anticoagulant therapy, except for aspirin, NSAIDs, |

|                              |                                                                                                                                                                                                                                                                                                                                                                                                        |                                                                                                                                                                                                                                                                                                                                                                                                                                                                                                                                                                                                                                                                              |
|------------------------------|--------------------------------------------------------------------------------------------------------------------------------------------------------------------------------------------------------------------------------------------------------------------------------------------------------------------------------------------------------------------------------------------------------|------------------------------------------------------------------------------------------------------------------------------------------------------------------------------------------------------------------------------------------------------------------------------------------------------------------------------------------------------------------------------------------------------------------------------------------------------------------------------------------------------------------------------------------------------------------------------------------------------------------------------------------------------------------------------|
|                              |                                                                                                                                                                                                                                                                                                                                                                                                        | or vitamin E if discontinued 7-14 days prior to each session; hematologic or coagulation disorders                                                                                                                                                                                                                                                                                                                                                                                                                                                                                                                                                                           |
| Kapoor <i>et al.</i> 2020    | Male patients, aged 25-50 years with Norwood Hamilton grade II-IV<br>Individuals who have not responded to topical minoxidil for a period of 1 year or more<br>Nonresponders of oral finasteride 1 mg for 1 year                                                                                                                                                                                       | History of hair loss <6 months.<br>Patients with serious drug allergies, diagnosed or suspected malignancies, autoimmune/hematologic disorders. Seborrheic dermatitis.<br>Patients who had recently started or stopped oral finasteride and/or minoxidil                                                                                                                                                                                                                                                                                                                                                                                                                     |
| Mapar <i>et al.</i> 2016     | Men aged 25–45 years with AGA grade IV–VI of Norwood hair loss classification, who had not received any treatment in the past three months.                                                                                                                                                                                                                                                            | Infection or seborrheic dermatitis on the scalp<br>Coagulation disorders or administration of aspirin during the past three weeks<br>Systemic diseases, hepatitis, HIV infection<br>AGA degree VI or higher (Norwood–Hamilton scale)<br>Hyperandrogenism<br>Inflammatory processes on the scalp<br>Use of hair growth-stimulating drugs, androgen synthesis inhibitors (finasteride, dutasteride)<br>Endocrinopathies that affect the exchange of steroids<br>Patients with hair transplant<br>Drugs lowering platelet levels (aspirin/other NSAID)<br>Leukocytosis / thrombocytopenia<br>Presence of side effects from treatment<br>Tendency to keloid / hypertrophic scars |
| Pakhomova & Smirnova 2020    | Men aged 18-53 with presence of AGA degrees I-IV on the Norwood-Hamilton scale inclusively                                                                                                                                                                                                                                                                                                             | Other hair loss treatments during the study and for 60 days before the study<br>Without known disease                                                                                                                                                                                                                                                                                                                                                                                                                                                                                                                                                                        |
| Puig <i>et al.</i> 2016      | Females at least 18 years of age, diagnosed with Ludwig II female androgenetic alopecia                                                                                                                                                                                                                                                                                                                | Previous hair transplantation and other history of any disease related to hair loss, such as thyroid disease and/ or iron deficiency; and present or past neoplasia, kidney, liver, infectious, hematologic, or rheumatoid diseases.<br>Using of antiplatelet and/or antiinflammatory drugs                                                                                                                                                                                                                                                                                                                                                                                  |
| Rodrigues <i>et al.</i> 2020 | Men aged between 18 and 50 years and presentation of AGA-III-vertex profile according to the Norwood-Hamilton scale                                                                                                                                                                                                                                                                                    |                                                                                                                                                                                                                                                                                                                                                                                                                                                                                                                                                                                                                                                                              |
| Shapiro <i>et al.</i> 2020   | Men aged 18-58 years with Norwood-Hamilton Stage III-V M-AGA<br>Females aged 18-58 years with Ludwig Stage I or II F-AGA<br>Subjects taking aspirin or other NSAIDS were allowed to participate after discontinuing use seven days before beginning treatment. Subjects taking vitamin E supplements were also allowed to participate provided use was discontinued 14 days before beginning treatment | Topical/systemic medication for AGA in the previous 3 months<br>History of hair transplantation, facial cancer, chemotherapy<br>Hematologic/coagulation disorders, and hemodynamic instability, anticoagulant therapy<br>Any acute infection or autoimmune disease<br>Pregnant or breastfeeding                                                                                                                                                                                                                                                                                                                                                                              |
| Singh <i>et al.</i> 2019     | Male patients aged 18–60 with male-type baldness grade II–V (Hamilton-Norwood scale)                                                                                                                                                                                                                                                                                                                   | Using topical/oral medication for hair loss during the previous 6 months<br>Inflammation or erythema (except mild seborrheic dermatitis), or scarring over the scalp<br>Anticoagulants, antihypertensives, anticonvulsants, aspirin / other NSAID<br>History of malignancies, bleeding disorders, bone marrow aplasia, diabetes, HIV, hepatitis B or C, immunosuppression, propensity for keloids                                                                                                                                                                                                                                                                            |
| Tawfick & Osman 2020         | Females aged 20-45 with female pattern hair loss grade I-III (Ludwig classification)                                                                                                                                                                                                                                                                                                                   | Topical or systemic treatments for hair loss in the previous 3 months<br>Patients who are pregnant or those with a present history of keloids, malignancies, bleeding disorders, and thyroid dysfunction                                                                                                                                                                                                                                                                                                                                                                                                                                                                     |

**Table S2.** Methods of PRP preparation, injection and of patient monitoring for the clinical trials included in the meta-analysis.

| Study                      | PRP preparation and injection method                                                                                                                                                                                                                                                                                                            | Monitoring method                                                                                                                                                                                                                                                                                                               |
|----------------------------|-------------------------------------------------------------------------------------------------------------------------------------------------------------------------------------------------------------------------------------------------------------------------------------------------------------------------------------------------|---------------------------------------------------------------------------------------------------------------------------------------------------------------------------------------------------------------------------------------------------------------------------------------------------------------------------------|
| Alves & Grimalt 2016       | 18 ml peripheral blood on 2 ml 3.8% Na citrate centrifuged at 460g 8 min<br>collection of middle PRP layer (3 ml)<br>activation with 0.15 ml CaCl <sub>2</sub> before application<br>injection in 4 selected scalp areas 0.15 ml/cm <sup>2</sup> with a 30-G needle, without local anesthesia                                                   | Global photography and phototrichogram<br>Global photographs of 3 scalp areas (vertex, frontal, occipital) taken with Canon Canfield Orthostatic Dev. (Omnia Digital Imaging System, Fairfield, NJ)<br>Phototrichograms via epiluminescence microscopy, Digital image analysis with FotoFinder, TrichoScan professional version |
| Bayat <i>et al.</i> 2019   | 15 ml blood collected from brachial vein on citrate centrifuged 8 min at 2000g<br>PRP centrifuged 15 min at 4000g to collect precipitated platelet-rich fraction<br>5 ml PRP injected at 125 points (0.04 ml/cm <sup>2</sup> ) under local anesthesia                                                                                           | Digital photography and dermoscopy photos in fixed locations (at equal distance above eyebrows aligned to midpupillary line)<br>Estimates of number of hair follicles per unit area and average hair thickness<br>Clinical assessment by 2 independent observers using the 15-point Jaeschke scoring system                     |
| Bruce <i>et al.</i> 2019   | 60 ml blood collected from peripheral vein using 8 ml citrate dextrose solution as anticoagulant<br>Initial 10-minute centrifugation (1500 rpm) with additional centrifugation (3500 rpm) for 10 minutes<br>5 ml PRP injected at 50 injection points (0.1 ml/point) with 30-G needle under cold air analgesia                                   | Standardized TrichoScan analysis and quality-of-life questionnaires were assessed at baseline and 12-week follow-up for each treatment                                                                                                                                                                                          |
| Butt <i>et al.</i> 2018    | 9 ml of blood with sodium citrate centrifuged at 1000 rpm for 10 min.<br>PRP injected into affected scalp areas (0.05-0.1 ml/cm <sup>2</sup> ) at 1 cm distance at a depth of 1.5-2.5 mm                                                                                                                                                        | Macroscopic photographs, pull test, trichoscopic photomicrographs, physician global assessment score (PhGAS), and patient global assessment score (PaGAS)                                                                                                                                                                       |
| Butt <i>et al.</i> 2019    | 9 ml whole blood collected on sodium citrate centrifuged 10 minutes at 650 g to obtain 5 mL of PRP; intradermal injection with insulin syringe in points at 0.5 cm apart under lignocaine gel anesthesia                                                                                                                                        | Macroscopic photographs with Nikon camera<br>Trichoscan by standard epiluminescence microscopy<br>for hair density; Pull test; Physician global assessment score (PhGAS) by 2 evaluators                                                                                                                                        |
| Gentile <i>et al.</i> 2015 | Cascade-Selphyl-Esforax system (18 ml blood) or Platelet Rich Lipotransfert system (60 mL peripheral blood) collected using Na citrate centrifuged at 1,200 rpm for 10 min; platelet secretion stimulated by Ca <sup>2+</sup><br>9 mL PRP (0.1 ml/cm <sup>2</sup> ) injected in selected areas 3 times at 30-days intervals, without anesthesia | Standardized phototrichograms with Fotofinder video-epiluminescence microscopy and Trichoscan digital image analysis<br>Global photography, physician's and patient's global assessment scale<br>3 3-mm punch biopsies, hematoxylin-eosin stain and immunohistochemistry (Ki67)                                                 |
| Hausauer & Jones 2018      | EclipsePRP kit: 22 ml peripheral blood centrifuged at 3500 rpm for 10 min<br>4-6 mL PRP injected in 0.2 to 0.5 mL aliquots sub-dermally using a 32-G half-inch needle every 2 to 3 cm at balding areas; optional topical lidocaine anesthesia                                                                                                   | Baseline magnified Folliscope2.8 and global (Hair Metrix) photographs for assessment of hair count (hairs/cm <sup>2</sup> ), shaft caliber (μm), and Norwood–Hamilton or Ludwig scale<br>Satisfaction and outcome questionnaires                                                                                                |
| Kapoor <i>et al.</i> 2020  | 1.5 mL of PRP were used in a total of 8 sessions at 3-weeks intervals<br>60-70 tiny (0.02 mL) intradermal injections were administered at points located 1 cm apart, covering the visible areas of hair thinning and alopecia                                                                                                                   | All patients evaluated at baseline<br>Standard global photographic and videometric assessment<br>Hair pull test<br>Patient self-assessment                                                                                                                                                                                      |
| Mapar <i>et al.</i> 2016   | 9 ml of blood from antecubital veins on 1 ml acidic citrate dextrose; centrifuged 6 min at 3000 rpm;<br>recentrifuged 3 min at 3300 rpm<br>Dermal injection of 1.5 mL PRP with 30-G needle in 2 sessions (1 month apart) using acidic citrate dextrose and 0.1 ml of calcium gluconate for every ml of PRP                                      | Terminal and vellus hairs counted in each square before every injection using a magnifying glass                                                                                                                                                                                                                                |

|                              |                                                                                                                                                                                                                                                                                                                           |                                                                                                                                                                                                                                                                                                                                           |
|------------------------------|---------------------------------------------------------------------------------------------------------------------------------------------------------------------------------------------------------------------------------------------------------------------------------------------------------------------------|-------------------------------------------------------------------------------------------------------------------------------------------------------------------------------------------------------------------------------------------------------------------------------------------------------------------------------------------|
| Pakhomova & Smirnova<br>2020 | 18 ml venous blood collected on 3.8% sodium citrate (10:1 ratio); centrifuged 5 min at 570g; recentrifuged 10 min at 1200g; CaCl <sub>2</sub> 1:20 used as activator<br>4 procedures at 1-month intervals: 4 ml of PRP injected intradermally (0.15 ml per injection) in the parietal zone of AGA                         | Trichological study with a digital video camera “Aramo S” and the TrichoSciencePro v 1.3RUS computer program (control points marked with a tattoo); hair density (cm <sup>2</sup> ), proportion of vellus and telogen hairs (%), average diameter of hairs (μm)<br>Immunohistochemistry of skin biopsies for Ki67, β-catenin, CD34, DKK-1 |
| Puig <i>et al.</i> 2016      | Angel PRP system (Cytomedix): 10 ml PRP from 60 ml blood (2.75-3.4x platelet concentration factor) 1 treatment in an area of 10 cm located in the central scalp                                                                                                                                                           | Photography (for hair count)<br>Cohen hair check system (for hair mass index)<br>Patient survey                                                                                                                                                                                                                                           |
| Rodrigues <i>et al.</i> 2020 | 50 ml peripheral vein blood collected on acid citrate dextrose, 4 ml on EDTA and 1 ml without anticoagulant (autologous serum used as activator); centrifuged 15 min at 1258g<br>4 applications at 15-days intervals<br>2 mL PRP/saline applied with 32-G needle in 20 subcutaneous injections of 100 μl into the scalp   | TrichoScan method for hair growth, hair density, and percentage of anagen hairs<br>Evaluation before injection, at 15 days and 3 months after last injection<br>Growth factors (PDGF, EGF, and VEGF) measured by Luminex method                                                                                                           |
| Shapiro <i>et al.</i> 2020   | Regen Blood Cell Therapy Kit: 10 ml blood from antecubital veins; centrifuged 5 min at 1500g in tubes with thixotropic gel<br>3 treatment sessions at 1-month intervals<br>5 mL PRP injected (0.1-0.2 ml per injection) at a depth of 3-4 mm, 35°-45° angle; topical lidocaine anesthesia at request                      | Folliscope examination (hair density, mean hair shaft diameter)<br>Photography at baseline and each subsequent visit<br>Investigator Global Assessment questionnaire<br>Self-assessment by Quality of Life Questionnaire                                                                                                                  |
| Singh <i>et al.</i> 2019     | 18 ml blood collected on 2 ml sodium citrate 3.8% centrifuged 10 min at 2200rpm; recentrifuged 6 min at 3000rpm (4.2x platelet concentration factor); platelet secretion activated with calcium gluconate<br>3 monthly sessions with 3-3.5 ml PRP intradermal (0.05-0.1 ml/cm <sup>2</sup> ) following topical anesthesia | Dermoscopic photographs of a 1-cm <sup>2</sup> area taken at fixed site (repeated every month) (for hair density)<br>Clinical photography<br>Patient self-assessment (monthly for 5 months)                                                                                                                                               |
| Tawfick & Osman 2020         | 10 ml blood from median cubital vein collected on 1.5 ml sodium citrate; centrifuged 15 min at 1200g; recentrifuged 10 min at 2000g; calcium gluconate 1:9 added to PRP; 4 treatments at 1-week intervals                                                                                                                 | Global photography, standardized phototrichograms, hair pull test, patient’s satisfaction scale                                                                                                                                                                                                                                           |

**Table S3.** Influence of sex composition of study groups on hair density (initial and after PRP treatment)

| Study                                                                       | Sex | Hair density in control group (hairs/cm <sup>2</sup> ) | Absolute change in hair density (hairs/cm <sup>2</sup> ) | Relative change in hair density (%)           |
|-----------------------------------------------------------------------------|-----|--------------------------------------------------------|----------------------------------------------------------|-----------------------------------------------|
| Bayat <i>et al.</i> 2019                                                    | M   | 30.11                                                  | 8.47                                                     | 28.13                                         |
| Gentile <i>et al.</i> 2015                                                  | M   | 161.2                                                  | 45.9                                                     | 28.47                                         |
| Kapoor <i>et al.</i> 2020                                                   | M   | 167.2                                                  | 8.9                                                      | 5.32                                          |
| Mapar <i>et al.</i> 2016                                                    | M   | 87.29                                                  | -2.23                                                    | -2.55                                         |
| Pakhomova & Smirnova 2020 group I                                           | M   | 381.5                                                  | 44.6                                                     | 11.69                                         |
| Pakhomova & Smirnova 2020 group II                                          | M   | 408.4                                                  | 131.2                                                    | 32.13                                         |
| Rodrigues <i>et al.</i> 2020                                                | M   | 140                                                    | 40                                                       | 28.57                                         |
| Singh <i>et al.</i> 2019 PRP group                                          | M   | 93.73                                                  | 49.47                                                    | 52.78                                         |
| Singh <i>et al.</i> 2019 PRP+minoxidil group                                | M   | 90.05                                                  | 60.4                                                     | 67.07                                         |
| <b>Mean ± SD</b>                                                            |     | <b>173.28 ± 132.79</b>                                 | <b>42.97 ± 39.60</b>                                     | <b>27.96 ± 22.00</b>                          |
| Alves & Grimalt 2016                                                        | M/F | 165.7                                                  | 14.2                                                     | 8.57                                          |
| Bruce <i>et al.</i> 2019 arm A                                              | F   | 134                                                    | 11                                                       | 8.21                                          |
| Bruce <i>et al.</i> 2019 arm B                                              | F   | 139                                                    | 14                                                       | 10.07                                         |
| Butt <i>et al.</i> 2018                                                     | M/F | 34.18                                                  | 16.02                                                    | 46.87                                         |
| Butt <i>et al.</i> 2019 PRP                                                 | M/F | 52.64                                                  | 11.08                                                    | 21.05                                         |
| Butt <i>et al.</i> 2019 SVF-PRP                                             | M/F | 37.66                                                  | 19.45                                                    | 51.65                                         |
| Hausauer & Jones 2018 PRP group 1                                           | M/F | 160.4                                                  | 46.7                                                     | 29.11                                         |
| Hausauer & Jones 2018 PRP group 2                                           | M/F | 177.6                                                  | 13                                                       | 7.32                                          |
| Puig <i>et al.</i> 2016                                                     | F   |                                                        |                                                          |                                               |
| Shapiro <i>et al.</i> 2020                                                  | M/F | 151                                                    | 19.96                                                    | 13.22                                         |
| Tawfick & Osman 2020                                                        | F   | 73.66                                                  | 77.28                                                    | 104.91                                        |
| <b>Mean ± SD</b>                                                            |     | <b>112.58 ± 56.60</b>                                  | <b>24.27 ± 21.36</b>                                     | <b>30.10 ± 30.86</b>                          |
| <b>Statistical significance of differences between M and F/mixed groups</b> |     | $t = 1.321$<br>17 <i>d.f.</i><br>$p = 0.204$           | $U = 38.00$<br>$p = 0.604$                               | $t = 0.1723$<br>17 <i>d.f.</i><br>$p = 0.865$ |
